# Supplementary material for: International Olympic Committee (IOC) consensus paper on sports-related ophthalmology issues in elite sports
Source: PubMed Central journal article supplement — BMJ Open Sport Exerc Med. 2023 Jul 19;9(3):e001644. doi: 10.1136/bmjsem-2023-001644 (PMC10357794; doi:10.1136/bmjsem-2023-001644), 2023-07-19
Supplement: bmjsem-2023-001644supp001.pdf [file bmjsem-2023-001644supp001.pdf]

## APPENDIX

To optimize photos, the Kellogg Eye Center recommends:

- Capture from as close as possible while not losing focus of the image. This is typically 10-15cm away from face.
- Be sure to turn the flash ON.
- Hold the camera in a position where it is not casting a shadow on the face.
- Keep the camera as still as possible e.g. use a tripod or gimbal
- Keep the patient's head comfortable and stable
- Use "burst mode" on the camera to take as many pictures as possible.
- Point the lens at the area of interest and get as close as the camera will allow while maintaining focus.
- Try to have your eye facing a strong, but not direct, light source. You are trying to get catch-light reflections in the patient's eyes
- During the day, take photos at the edge of the shaded area
- If indoors, sit facing a sunny, but shaded window (looking out the window with the light coming into the subject's eye. The photographer should position at an angle so the sun shines onto the subject's eye as much as possible
- Avoid taking the photo in direct sunlight
- Add an additional light source if possible but avoid pointing it towards the eye
- Set the resolution of the photo on high
- Aim the camera at the area of interest so it is in the center of the screen and then tap over the area of interest on the screen and a small yellow square should appear over area of focus
