# Supplementary material for: International Olympic Committee (IOC) consensus paper on sports-related ophthalmology issues in elite sports
Source: PubMed Central journal article supplement — BMJ Open Sport Exerc Med. 2023 Jul 19;9(3):e001644. doi: 10.1136/bmjsem-2023-001644 (PMC10357794; doi:10.1136/bmjsem-2023-001644), 2023-07-19
Supplement: bmjsem-2023-001644supp003.pdf [file bmjsem-2023-001644supp003.pdf]

**Name:**

**Date:**

**Date of Birth:**

**Type of Sport:**

**Type of Ocular Injury:**

**Visual Acuity:**

**OD:**

**OS:**

**Pupillary Responses:**

**Direct / Indirect:**

**Ocular Motility:**

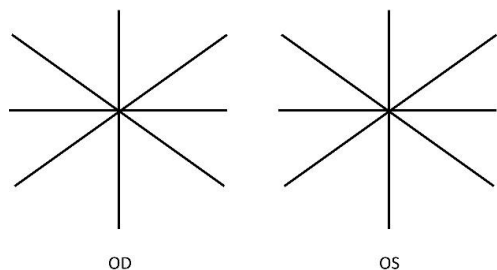

**Confrontation Visual Field:**

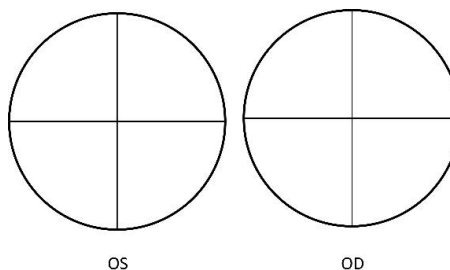

**Anterior Segment:**

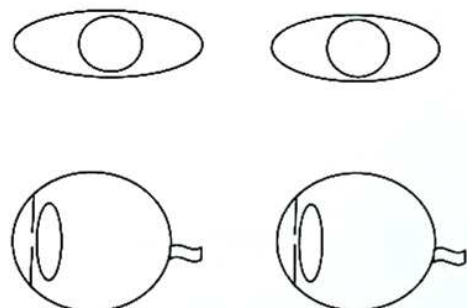

**Posterior Segment**

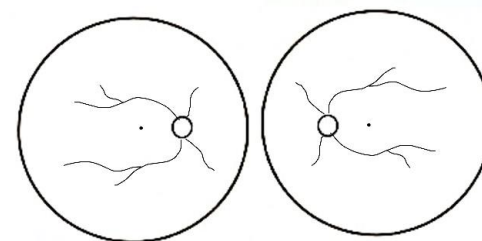

| <b>Signs and Symptoms that Require Immediate Referral</b>                     |                                                                                                            |
|-------------------------------------------------------------------------------|------------------------------------------------------------------------------------------------------------|
| <input type="checkbox"/> Severe decrease in or total loss of vision           | <input type="checkbox"/> Asymmetric appearance of orbita and / or eye glob                                 |
| <input type="checkbox"/> Visual field defect on confrontation                 | <input type="checkbox"/> Bony step-offs of the orbital rim                                                 |
| <input type="checkbox"/> Defect in pupillary responses                        | <input type="checkbox"/> Painting of cornea or leaking of anterior chamber fluid with fluorescein dye test |
| <input type="checkbox"/> Irritation (Severe redness)                          | <input type="checkbox"/> Shallow or flat anterior chamber                                                  |
| <input type="checkbox"/> Light sensitivity (Photophobia)                      | <input type="checkbox"/> Hyphema (Blood in anterior chamber)                                               |
| <input type="checkbox"/> Pain / Restrictions in eye movements                 | <input type="checkbox"/> Pupillary irregularities (Teardrop shaped pupil)                                  |
| <input type="checkbox"/> Double vision (Diplopia)                             | <input type="checkbox"/> Inability to view the posterior segment                                           |
| <input type="checkbox"/> Light flashes or floaters                            | <input type="checkbox"/> Eyelid margin or medial canthus injuries                                          |
| <input type="checkbox"/> Seeing halos around lights                           | <input type="checkbox"/> Foreign body sensation /Suspect of foreign body                                   |
| <input type="checkbox"/> Prescence of chemosis and subconjunctival hemorrhage | <input type="checkbox"/> Any suspect for perforation                                                       |
